# Supplementary material for: Single-chain magnet behavior in a 2p–3d–4f spin array with a nitronyl nitroxide biradical
Source: Royal Society of Chemistry journal article supplement (doi:10.1039/d0qi00098a), 2020-01-01
Supplement: d0qi00098a1.pdf [file d0qi00098a1.pdf]

## Supporting Information

### Single-chain magnet behavior in 2p-3d-4f spin array with nitronyl nitroxide biradical

Juan Sun,<sup>a</sup> Jing Xie,<sup>a</sup> Licun Li,<sup>\*,a</sup> Jean-Pascal Sutter<sup>\*,b</sup>

<sup>a</sup> Department of Chemistry, Key Laboratory of Advanced Energy Materials  
Chemistry, College of Chemistry, Nankai University, Tianjin 300071, China.

E-mail: llicun@nankai.edu.cn

<sup>b</sup> Laboratoire de Chimie de Coordination du CNRS (LCC-CNRS), Université de  
Toulouse, CNRS, Toulouse, France.

E-mail: sutter@lcc-toulouse.fr

#### Contents

|                                                                                                       |   |
|-------------------------------------------------------------------------------------------------------|---|
| Table S1. Selected bond lengths [Å] and angles [°] for <b>1</b> .....                                 | 3 |
| Table S2. Selected bond lengths [Å] and angles [°] for <b>2</b> .....                                 | 4 |
| Table S3. Selected bond lengths [Å] and angles [°] for <b>3</b> .....                                 | 5 |
| Table S4. Table S4. SHAPE analysis for the Ln coordination spheres for <b>1-3</b> .....               | 6 |
| Fig. S1 Powder X-ray diffraction patterns of complexes <b>1-3</b> .....                               | 6 |
| Fig. S2 One-dimensional structure of <b>1</b> and local coordination geometry of Gd(III) ion<br>..... | 6 |
| Fig. S3 One-dimensional structure of <b>3</b> and local coordination geometry of Ho(III) ion<br>..... | 7 |
| Fig. S4 Packing arrangement of the chains in <b>1</b> .....                                           | 7 |
| Fig. S5 Packing arrangement of the chains in <b>2</b> .....                                           | 8 |

|                                                                                                                                                                                                                                                                                    |    |
|------------------------------------------------------------------------------------------------------------------------------------------------------------------------------------------------------------------------------------------------------------------------------------|----|
| Fig. S6 Packing arrangement of the chains in <b>3</b> .....                                                                                                                                                                                                                        | 8  |
| Fig. S7 Plot of magnetization vs field for <b>1</b> at 2 K.....                                                                                                                                                                                                                    | 9  |
| Fig. S8 Plot of magnetization vs field for <b>2</b> at 2 K.....                                                                                                                                                                                                                    | 9  |
| Fig. S9 Compound <b>3</b> : (a) $\chi_M T = f(T)$ for susceptibility data obtained in a field of 50 Oe (in red) and 1 kOe (in blue); (b) magnetization vs field at 2 K, 3 K, 4 K and 5 K; (c) $\ln(\chi_M T) = f(1/T)$ and best fit of the linear section between 2.5 and 5 K..... | 10 |
| Fig. S10 Temperature dependence of in phase ( $\chi'$ ) and out of phase ( $\chi''$ ) of <b>1</b> in 0 Oe dc field with an oscillation of 3 Oe .....                                                                                                                               | 10 |
| Fig. S11 Temperature-dependent ac signals under a zero dc field for compound <b>2</b> ....                                                                                                                                                                                         | 11 |
| Fig. S12. Compound <b>3</b> : $\chi_M'$ and $\chi_M'' = f(T)$ in zero and 1 kOe dc field between 2-10 K                                                                                                                                                                            | 11 |

**Table S1.** Selected bond lengths [ $\text{\AA}$ ] and angles [ $^\circ$ ] for **1**.

| <i>Bond distances</i> |            |                       |          |
|-----------------------|------------|-----------------------|----------|
| Gd(1)-O(3)            | 2.393(5)   | Cu(2)-O(9)#1          | 1.927(6) |
| Gd(1)-O(2)            | 2.386(5)   | Cu(2)-O(1)            | 2.386(6) |
| Gd(1)-O(13)           | 2.355(6)   | Cu(2)-O(1)#1          | 2.386(6) |
| Gd(1)-O(18)           | 2.379(5)   | Cu(2)-O(10)#1         | 1.934(6) |
| Gd(1)-O(15)           | 2.318(5)   | Cu(2)-O(10)           | 1.934(6) |
| Gd(1)-O(17)           | 2.320(6)   | Cu(3)-O(12)           | 1.927(5) |
| Gd(1)-O(16)           | 2.385(5)   | Cu(3)-O(11)           | 1.936(6) |
| Gd(1)-O(14)           | 2.381(6)   | Cu(3)-O(4)            | 2.611(6) |
| Cu(1)-O(8)            | 1.936(6)   | Cu(3)-O(4)#1          | 2.611(6) |
| Cu(1)-O(5)            | 1.981(7)   | O(3)-N(4)             | 1.293(8) |
| Cu(1)-N(1)            | 2.033(7)   | O(2)-N(3)             | 1.302(8) |
| Cu(1)-O(7)            | 2.136(6)   | N(5)-O(4)             | 1.271(8) |
| Cu(1)-O(6)            | 1.930(6)   | N(2)-O(1)             | 1.275(8) |
| Cu(2)-O(9)            | 1.927(5)   |                       |          |
| <i>Angles</i>         |            |                       |          |
| O(2)-Gd(1)-O(3)       | 82.42(18)  | O(6)-Cu(1)-O(8)       | 173.8(3) |
| O(13)-Gd(1)-O(3)      | 71.38(17)  | O(6)-Cu(1)-O(5)       | 90.7(3)  |
| O(13)-Gd(1)-O(2)      | 115.51(18) | O(6)-Cu(1)-N(1)       | 93.3(3)  |
| O(13)-Gd(1)-O(18)     | 139.54(18) | O(6)-Cu(1)-O(7)       | 87.4(3)  |
| O(13)-Gd(1)-O(16)     | 73.1(2)    | O(9)#1-Cu(2)-O(9)     | 180      |
| O(13)-Gd(1)-O(14)     | 72.3(2)    | O(9)#1-Cu(2)-O(1)#1   | 93.2(2)  |
| O(18)-Gd(1)-O(3)      | 70.70(17)  | O(9)#1-Cu(2)-O(1)     | 86.8(2)  |
| O(18)-Gd(1)-O(2)      | 72.57(18)  | O(9)-Cu(2)-O(1)       | 93.2(2)  |
| O(18)-Gd(1)-O(16)     | 130.95(18) | O(9)-Cu(2)-O(1)#1     | 86.8(2)  |
| O(18)-Gd(1)-O(14)     | 140.5(2)   | O(9)-Cu(2)-O(10)      | 87.6(2)  |
| O(15)-Gd(1)-O(3)      | 83.7(2)    | O(9)#1-Cu(2)-O(10)#1  | 87.6(2)  |
| O(15)-Gd(1)-O(2)      | 146.57(19) | O(9)-Cu(2)-O(10)#1    | 92.4(2)  |
| O(15)-Gd(1)-O(13)     | 88.3(2)    | O(9)#1-Cu(2)-O(10)    | 92.4(2)  |
| O(15)-Gd(1)-O(18)     | 74.15(18)  | O(1)#1-Cu(2)-O(1)     | 180      |
| O(15)-Gd(1)-O(17)     | 88.8(2)    | O(10)-Cu(2)-O(1)      | 98.3(3)  |
| O(15)-Gd(1)-O(16)     | 71.8(2)    | O(10)#1-Cu(2)-O(1)#1  | 98.3(3)  |
| O(15)-Gd(1)-O(14)     | 141.4(2)   | O(10)#1-Cu(2)-O(1)    | 81.7(3)  |
| O(17)-Gd(1)-O(3)      | 142.73(19) | O(10)-Cu(2)-O(1)#1    | 81.7(3)  |
| O(17)-Gd(1)-O(2)      | 84.1(2)    | O(10)#1-Cu(2)-O(10)   | 180      |
| O(17)-Gd(1)-O(13)     | 145.0(2)   | O(12)-Cu(3)-O(11)#2   | 86.8(2)  |
| O(17)-Gd(1)-O(18)     | 72.13(19)  | O(11)-Cu(3)-O(4)      | 78.8(2)  |
| O(17)-Gd(1)-O(16)     | 72.9(2)    | O(11)#2-Cu(3)-O(4)    | 101.2(2) |
| O(17)-Gd(1)-O(14)     | 89.0(2)    | O(11)-Cu(3)-O(11)#2   | 180      |
| O(16)-Gd(1)-O(3)      | 137.0(2)   | O(12)#2-Cu(3)-O(4)    | 97.4(2)  |
| O(16)-Gd(1)-O(2)      | 135.5(2)   | O(12)-Cu(3)-O(4)      | 82.6(2)  |
| O(14)-Gd(1)-O(3)      | 118.80(19) | O(12)#2-Cu(3)-O(12)   | 180      |
| O(14)-Gd(1)-O(2)      | 71.3(2)    | O(12)-Cu(3)-O(11)     | 93.2(2)  |
| O(14)-Gd(1)-O(16)     | 70.7(2)    | O(12)#2-Cu(3)-O(11)#2 | 93.2(2)  |
| O(8)-Cu(1)-O(5)       | 85.3(3)    | O(12)#2-Cu(3)-O(11)   | 86.8(2)  |
| O(8)-Cu(1)-N(1)       | 92.7(3)    | N(4)-O(3)-Gd(1)       | 139.2(4) |
| O(8)-Cu(1)-O(7)       | 89.3(3)    | N(3)-O(2)-Gd(1)       | 136.8(5) |
| O(5)-Cu(1)-N(1)       | 143.7(3)   | N(2)-O(1)-Cu(2)       | 149.2(6) |
| O(5)-Cu(1)-O(7)       | 107.6(3)   | N(5)-O(4)-Cu(3)       | 144.3(5) |
| N(1)-Cu(1)-O(7)       | 108.6(3)   |                       |          |

#1 -x,-y+2,-z+1

#2 -x+1,-y+2,-z+1

**Table S2.** Selected bond lengths [ $\text{\AA}$ ] and angles [ $^\circ$ ] for **2**.

| <i>Bond distances</i> |          |                      |           |
|-----------------------|----------|----------------------|-----------|
| Tb(1)-O(3)            | 2.391(6) | Cu(2)-O(10)          | 1.923(8)  |
| Tb(1)-O(2)            | 2.383(6) | Cu(2)-O(10)#2        | 1.923(8)  |
| Tb(1)-O(15)           | 2.312(6) | Cu(2)-O(1)#2         | 2.383(7)  |
| Tb(1)-O(18)           | 2.384(6) | Cu(2)-O(1)           | 2.383(7)  |
| Tb(1)-O(13)           | 2.365(7) | Cu(1)-O(6)           | 1.932(7)  |
| Tb(1)-O(16)           | 2.379(6) | Cu(1)-O(8)           | 1.932(7)  |
| Tb(1)-O(17)           | 2.328(7) | Cu(1)-O(7)           | 2.143(8)  |
| Tb(1)-O(14)           | 2.384(7) | Cu(1)-O(5)           | 1.977(8)  |
| Cu(3)-O(12)           | 1.922(6) | Cu(1)-N(1)           | 2.031(8)  |
| Cu(3)-O(11)#1         | 1.941(6) | O(3)-N(4)            | 1.291(9)  |
| Cu(3)-O(11)           | 1.941(6) | O(2)-N(3)            | 1.296(9)  |
| Cu(3)-O(4)            | 2.610(7) | O(4)-N(5)            | 1.258(10) |
| Cu(2)-O(9)#2          | 1.927(6) | O(1)-N(2)            | 1.246(10) |
| Cu(2)-O(9)            | 1.927(6) |                      |           |
| <i>Angles</i>         |          |                      |           |
| O(2)-Tb(1)-O(3)       | 81.8(2)  | O(12)#1-Cu(3)-O(4)   | 97.0(3)   |
| O(2)-Tb(1)-O(18)      | 72.4(2)  | O(11)#1-Cu(3)-O(11)  | 180       |
| O(2)-Tb(1)-O(14)      | 71.3(2)  | O(11)#1-Cu(3)-O(4)   | 79.3(2)   |
| O(15)-Tb(1)-O(3)      | 83.9(2)  | O(11)-Cu(3)-O(4)     | 100.7(2)  |
| O(15)-Tb(1)-O(2)      | 146.5(2) | O(9)#2-Cu(2)-O(9)    | 180       |
| O(15)-Tb(1)-O(18)     | 74.3(2)  | O(9)#2-Cu(2)-O(1)    | 93.8(3)   |
| O(15)-Tb(1)-O(13)     | 88.0(3)  | O(9)-Cu(2)-O(1)      | 86.2(3)   |
| O(15)-Tb(1)-O(16)     | 71.5(2)  | O(9)#2-Cu(2)-O(1)#2  | 86.2(3)   |
| O(15)-Tb(1)-O(17)     | 88.8(3)  | O(9)-Cu(2)-O(1)#2    | 93.8(3)   |
| O(15)-Tb(1)-O(14)     | 141.5(3) | O(10)#2-Cu(2)-O(9)#2 | 92.9(3)   |
| O(18)-Tb(1)-O(3)      | 71.1(2)  | O(10)-Cu(2)-O(9)#2   | 87.1(3)   |
| O(18)-Tb(1)-O(14)     | 140.1(3) | O(10)-Cu(2)-O(9)     | 92.9(3)   |
| O(13)-Tb(1)-O(3)      | 71.1(2)  | O(10)#2-Cu(2)-O(9)   | 87.1(3)   |
| O(13)-Tb(1)-O(2)      | 115.3(2) | O(10)-Cu(2)-O(10)#2  | 180.0(5)  |
| O(13)-Tb(1)-O(18)     | 139.6(2) | O(10)#2-Cu(2)-O(1)#2 | 97.8(4)   |
| O(13)-Tb(1)-O(16)     | 72.9(3)  | O(10)-Cu(2)-O(1)     | 97.8(4)   |
| O(13)-Tb(1)-O(14)     | 72.8(3)  | O(10)-Cu(2)-O(1)#2   | 82.2(4)   |
| O(16)-Tb(1)-O(3)      | 136.7(3) | O(10)#2-Cu(2)-O(1)   | 82.2(4)   |
| O(16)-Tb(1)-O(2)      | 136.3(2) | O(1)-Cu(2)-O(1)#2    | 180       |
| O(16)-Tb(1)-O(18)     | 130.8(2) | O(6)-Cu(1)-O(8)      | 173.9(3)  |
| O(16)-Tb(1)-O(14)     | 71.0(3)  | O(6)-Cu(1)-O(7)      | 87.1(3)   |
| O(17)-Tb(1)-O(3)      | 143.3(2) | O(6)-Cu(1)-O(5)      | 90.5(3)   |
| O(17)-Tb(1)-O(2)      | 84.9(3)  | O(6)-Cu(1)-N(1)      | 93.5(3)   |
| O(17)-Tb(1)-O(18)     | 72.3(2)  | O(8)-Cu(1)-O(7)      | 89.6(3)   |
| O(17)-Tb(1)-O(13)     | 144.6(2) | O(8)-Cu(1)-O(5)      | 85.5(3)   |
| O(17)-Tb(1)-O(16)     | 72.7(3)  | O(8)-Cu(1)-N(1)      | 92.5(3)   |
| O(17)-Tb(1)-O(14)     | 88.5(2)  | O(5)-Cu(1)-O(7)      | 107.3(3)  |
| O(14)-Tb(1)-O(3)      | 118.8(2) | O(5)-Cu(1)-N(1)      | 143.7(3)  |
| O(12)-Cu(3)-O(12)#1   | 180      | N(1)-Cu(1)-O(7)      | 108.9(3)  |
| O(12)#1-Cu(3)-O(11)   | 92.8(3)  | N(4)-O(3)-Tb(1)      | 139.3(5)  |
| O(12)#1-Cu(3)-O(11)#1 | 87.2(3)  | N(3)-O(2)-Tb(1)      | 137.9(6)  |
| O(12)-Cu(3)-O(11)     | 87.2(3)  | N(5)-O(4)-Cu(3)      | 145.0(6)  |
| O(12)-Cu(3)-O(11)#1   | 92.8(3)  | N(2)-O(1)-Cu(2)      | 150.1(8)  |
| O(12)-Cu(3)-O(4)      | 83.0(3)  |                      |           |

#1 -x,-y,-z    #2 -x+1,-y,-z

**Table S3.** Selected bond lengths [ $\text{\AA}$ ] and angles [ $^\circ$ ] for **3**.

| <i>Bond distances</i> |            |                      |            |
|-----------------------|------------|----------------------|------------|
| Ho(1)-O(3)            | 2.362(4)   | Cu(2)-O(10)          | 1.934(5)   |
| Ho(1)-O(2)            | 2.359(4)   | Cu(2)-O(10)#2        | 1.934(5)   |
| Ho(1)-O(15)           | 2.284(4)   | Cu(2)-O(1)           | 2.372(4)   |
| Ho(1)-O(16)           | 2.366(4)   | Cu(2)-O(1)#2         | 2.372(4)   |
| Ho(1)-O(18)           | 2.363(4)   | Cu(1)-O(7)           | 2.140(4)   |
| Ho(1)-O(14)           | 2.341(4)   | Cu(1)-O(6)           | 1.945(4)   |
| Ho(1)-O(13)           | 2.333(4)   | Cu(1)-O(8)           | 1.937(4)   |
| Ho(1)-O(17)           | 2.296(4)   | Cu(1)-O(5)           | 1.986(5)   |
| Cu(3)-O(12)           | 1.940(4)   | Cu(1)-N(1)           | 2.025(5)   |
| Cu(3)-O(11)           | 1.930(4)   | O(3)-N(4)            | 1.293(6)   |
| Cu(3)-O(4)#1          | 2.583(4)   | O(2)-N(3)            | 1.298(6)   |
| Cu(3)-O(4)            | 2.583(4)   | O(4)-N(5)            | 1.278(7)   |
| Cu(2)-O(9)#2          | 1.940(4)   | O(1)-N(2)            | 1.264(7)   |
| Cu(2)-O(9)            | 1.940(4)   |                      |            |
| <i>Angles</i>         |            |                      |            |
| O(3)-Ho(1)-O(16)      | 137.62(15) | O(11)-Cu(3)-O(12)    | 92.98(17)  |
| O(3)-Ho(1)-O(18)      | 69.80(13)  | O(11)#1-Cu(3)-O(12)  | 87.02(17)  |
| O(2)-Ho(1)-O(3)       | 82.45(13)  | O(11)-Cu(3)-O(11)#1  | 180        |
| O(2)-Ho(1)-O(16)      | 135.01(15) | O(11)-Cu(3)-O(4)#1   | 97.47(16)  |
| O(2)-Ho(1)-O(18)      | 72.26(13)  | O(11)#1-Cu(3)-O(4)   | 97.47(16)  |
| O(15)-Ho(1)-O(3)      | 83.75(14)  | O(11)-Cu(3)-O(4)     | 82.53(16)  |
| O(15)-Ho(1)-O(2)      | 146.00(14) | O(4)#1-Cu(3)-O(4)    | 180        |
| O(15)-Ho(1)-O(16)     | 72.43(15)  | O(9)-Cu(2)-O(9)#2    | 180        |
| O(15)-Ho(1)-O(18)     | 73.83(13)  | O(9)#2-Cu(2)-O(1)#2  | 87.94(17)  |
| O(15)-Ho(1)-O(14)     | 142.06(15) | O(9)#2-Cu(2)-O(1)    | 92.06(17)  |
| O(15)-Ho(1)-O(13)     | 88.23(15)  | O(9)-Cu(2)-O(1)      | 87.94(17)  |
| O(15)-Ho(1)-O(17)     | 88.50(16)  | O(10)#2-Cu(2)-O(9)#2 | 92.60(19)  |
| O(18)-Ho(1)-O(16)     | 131.59(13) | O(10)-Cu(2)-O(9)     | 92.60(19)  |
| O(14)-Ho(1)-O(3)      | 119.24(14) | O(10)-Cu(2)-O(9)#2   | 87.40(19)  |
| O(14)-Ho(1)-O(2)      | 70.97(16)  | O(10)-Cu(2)-O(10)#2  | 180        |
| O(14)-Ho(1)-O(16)     | 70.58(15)  | O(10)#2-Cu(2)-O(1)   | 81.5(2)    |
| O(14)-Ho(1)-O(18)     | 140.13(16) | O(10)-Cu(2)-O(1)     | 98.5(2)    |
| O(13)-Ho(1)-O(3)      | 71.61(13)  | O(10)#2-Cu(2)-O(1)#2 | 98.5(2)    |
| O(13)-Ho(1)-O(2)      | 116.25(13) | O(1)-Cu(2)-O(1)#2    | 180        |
| O(13)-Ho(1)-O(16)     | 73.08(15)  | O(6)-Cu(1)-O(7)      | 87.17(19)  |
| O(13)-Ho(1)-O(18)     | 138.78(14) | O(6)-Cu(1)-O(5)      | 90.8(2)    |
| O(13)-Ho(1)-O(14)     | 73.29(17)  | O(6)-Cu(1)-N(1)      | 92.79(19)  |
| O(17)-Ho(1)-O(3)      | 142.84(14) | O(8)-Cu(1)-O(7)      | 89.74(18)  |
| O(17)-Ho(1)-O(2)      | 84.08(15)  | O(8)-Cu(1)-O(6)      | 174.27(19) |
| O(17)-Ho(1)-O(16)     | 72.31(17)  | O(8)-Cu(1)-O(5)      | 85.5(2)    |
| O(17)-Ho(1)-O(18)     | 73.13(14)  | O(8)-Cu(1)-N(1)      | 92.75(19)  |
| O(17)-Ho(1)-O(14)     | 88.24(16)  | O(5)-Cu(1)-O(7)      | 107.0(2)   |
| O(17)-Ho(1)-O(13)     | 144.57(15) | O(5)-Cu(1)-N(1)      | 144.9(2)   |
| O(12)#1-Cu(3)-O(12)   | 180        | N(1)-Cu(1)-O(7)      | 108.0(2)   |
| O(12)-Cu(3)-O(4)      | 78.50(16)  | N(4)-O(3)-Ho(1)      | 138.7(3)   |
| O(12)#1-Cu(3)-O(4)    | 101.50(16) | N(3)-O(2)-Ho(1)      | 136.6(4)   |
| O(12)#1-Cu(3)-O(4)#1  | 78.50(16)  | N(5)-O(4)-Cu(3)      | 143.8(4)   |
| O(11)-Cu(3)-O(12)#1   | 87.02(17)  | N(2)-O(1)-Cu(2)      | 147.3(5)   |
| O(11)#1-Cu(3)-O(12)#1 | 92.98(17)  |                      |            |

#1 -x,-y+1,-z      #2 -x+1,-y+1,-z

**Table S4.** SHAPE analysis for the Ln coordination spheres for **1-3**.

| Compound    | SAPR-8 | TDD-8 | JBTPR-8 | BTPR-8 | JSD-8 |
|-------------|--------|-------|---------|--------|-------|
| <b>1 Gd</b> | 2.090  | 1.884 | 1.540   | 0.771  | 3.718 |
| <b>2 Tb</b> | 2.059  | 1.792 | 1.526   | 0.754  | 3.689 |
| <b>3 Ho</b> | 2.134  | 1.918 | 1.474   | 0.744  | 3.712 |

SAPR-8: Square antiprism; TDD-8: Triangular dodecahedron; JBTPR-8: Biaugmented trigonal prism J50; BTPR-8: Biaugmented trigonal prism; JSD-8: Snub diphendoid J84.

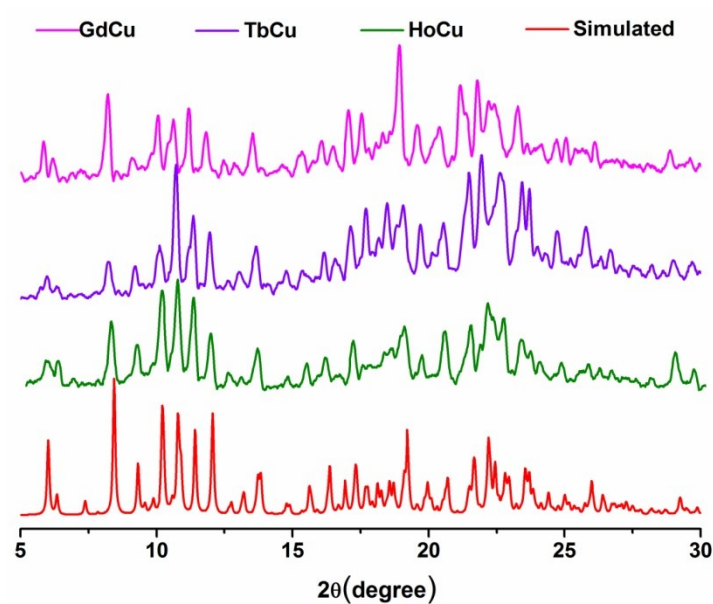

**Fig. S1** Powder X-ray diffraction patterns of complexes **1-3**.

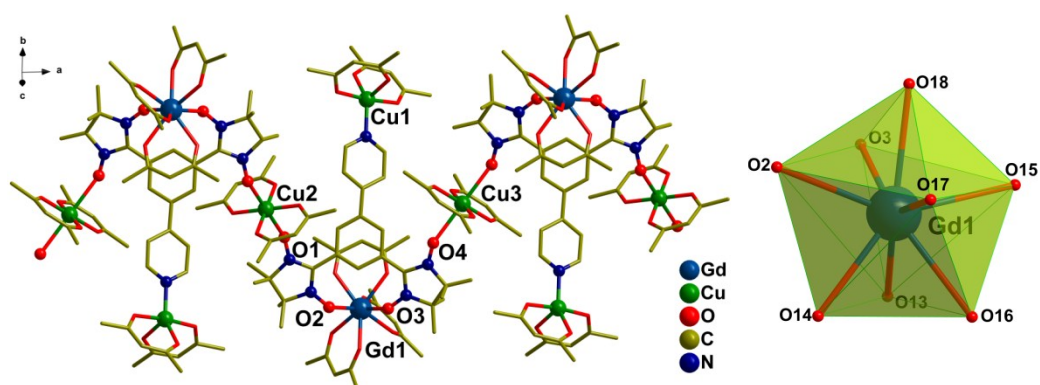

**Fig. S2** One-dimensional structure of **1** and local coordination geometry of Gd(III) ion (Fluorine and Hydrogen atoms are omitted for the sake of clarity).

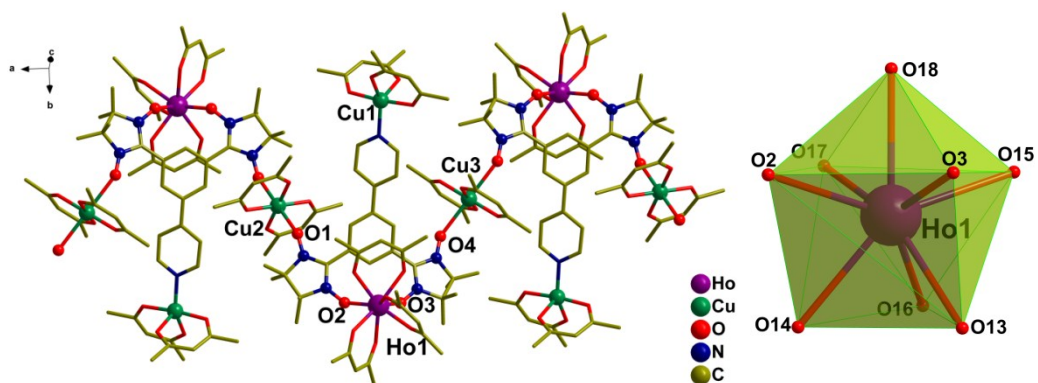

**Fig. S3** One-dimensional structure of **3** and local coordination geometry of Ho(III) ion (Fluorine and Hydrogen atoms are omitted for the sake of clarity).

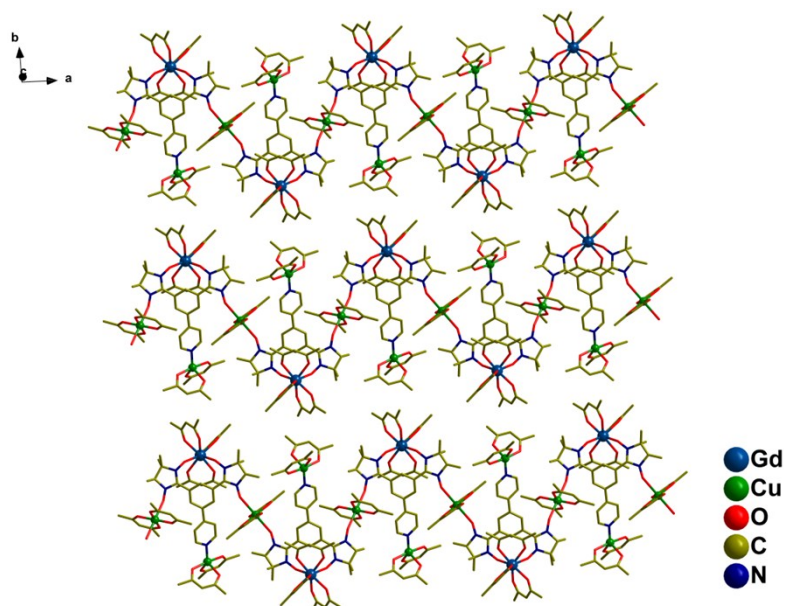

**Fig. S4** Packing arrangement of the chains in **1** (H and F atoms are omitted for clarity).

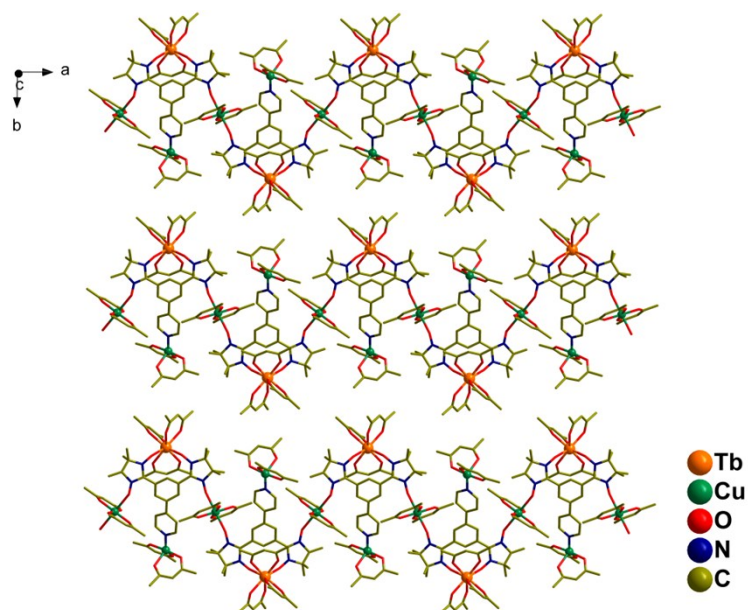

**Fig. S5** Packing arrangement of the chains in **2** (H and F atoms are omitted for clarity).

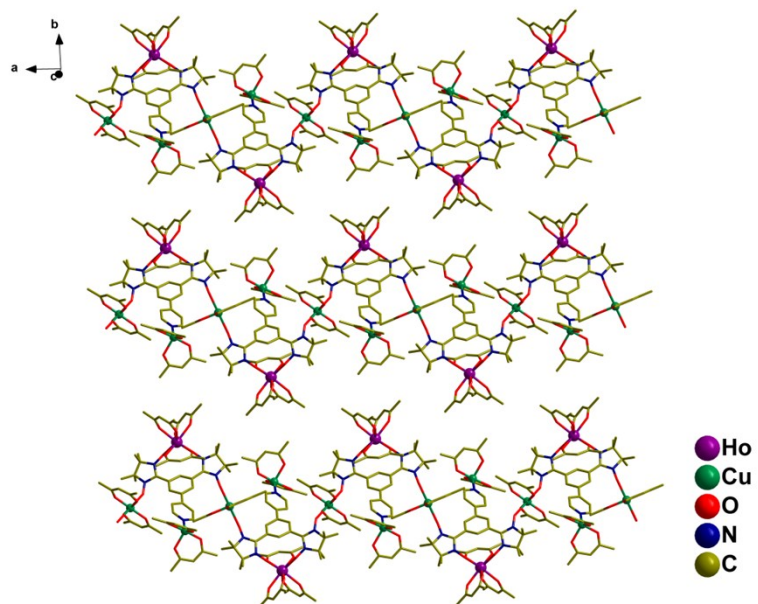

**Fig. S6** Packing arrangement of the chains in **3** (H and F atoms are omitted for clarity).



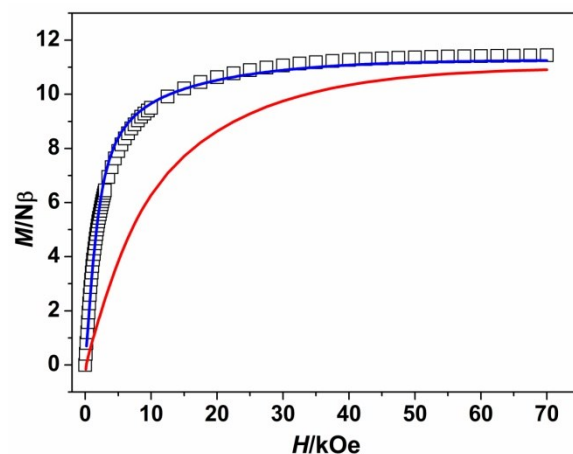

**Fig. S7** Plot of magnetization vs field for **1** at 2 K. The blue line is the calculated curve using Magpack program, and the red line shows the theoretical behavior for one  $S=7/2$  and four  $S=1/2$  non-coupled spins (see the text).

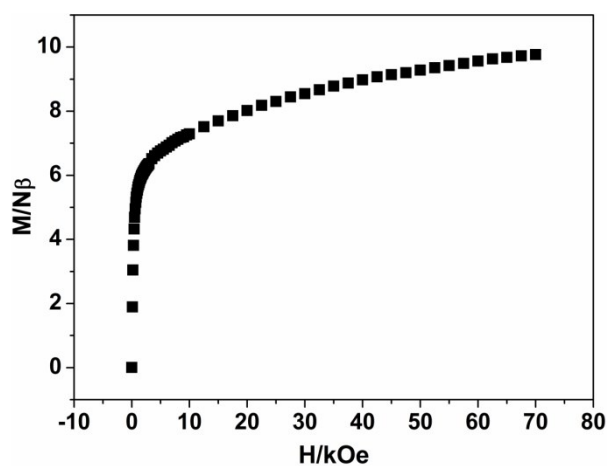

**Fig. S8** Plot of magnetization vs field for **2** at 2 K.

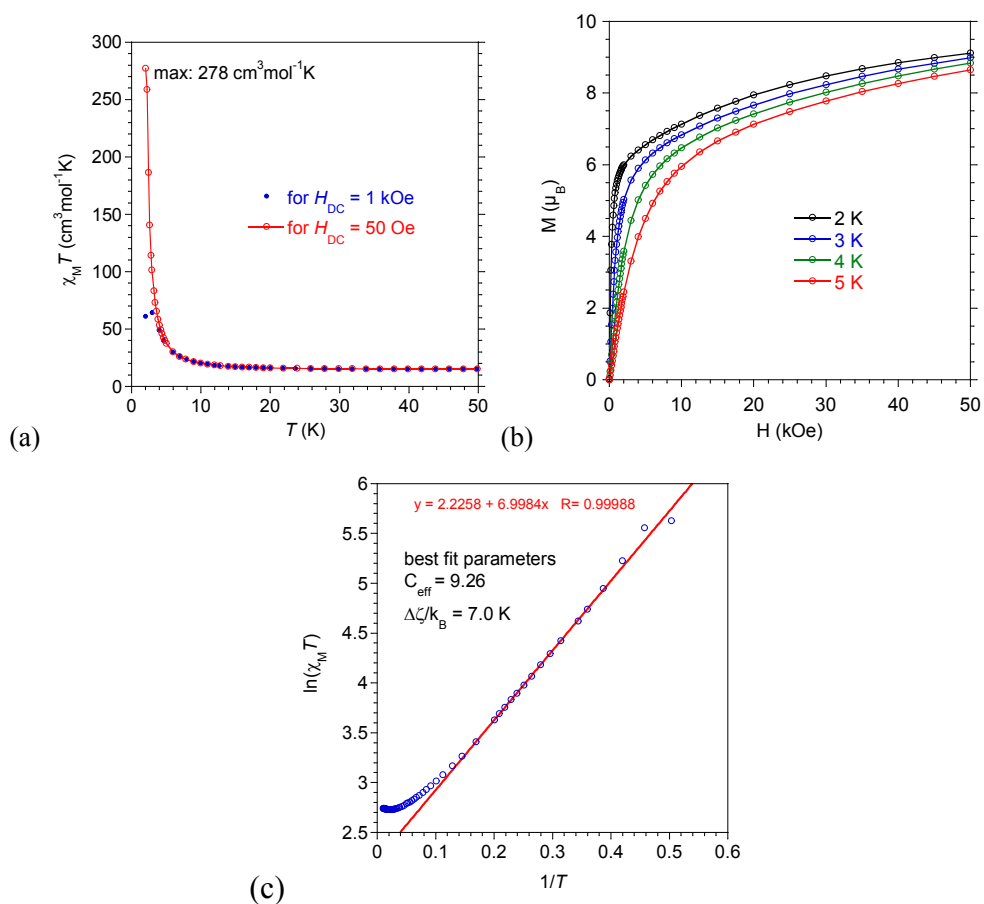

**Fig. S9** Compound **3**: (a)  $\chi_M T = f(T)$  for susceptibility data obtained in a field of 50 Oe (in red) and 1 kOe (in blue); (b) magnetization vs field at 2 K, 3 K, 4 K and 5 K; (c)  $\ln(\chi_M T) = f(1/T)$  and best fit of the linear section between 2.5 and 5 K.

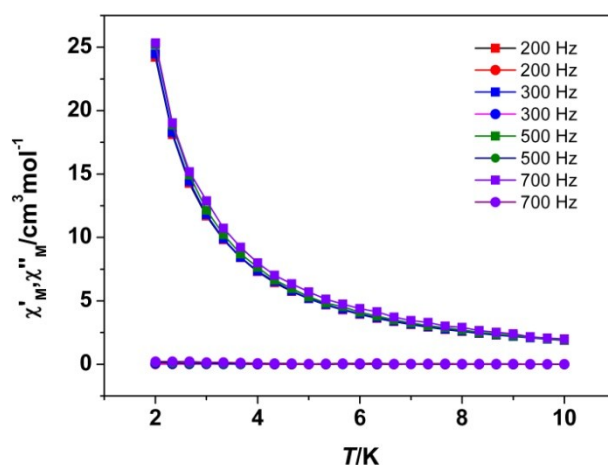

**Fig. S10** Temperature dependence of in phase ( $\chi'$ ) and out of phase ( $\chi''$ ) of **1** in 0 Oe dc field with an oscillation of 3 Oe.

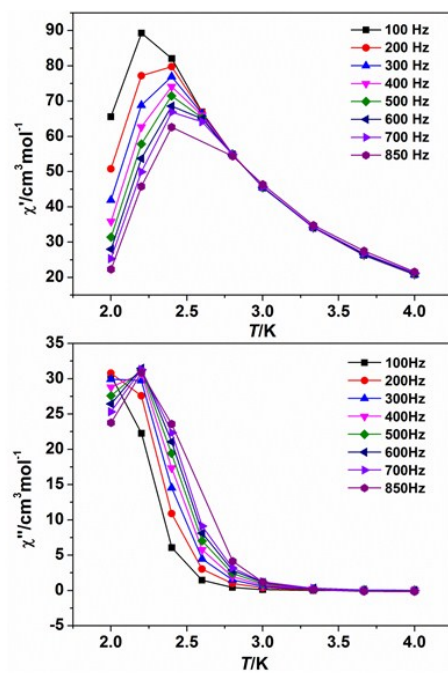

**Fig. S11** Temperature-dependent ac signals under a zero dc field for compound 2.

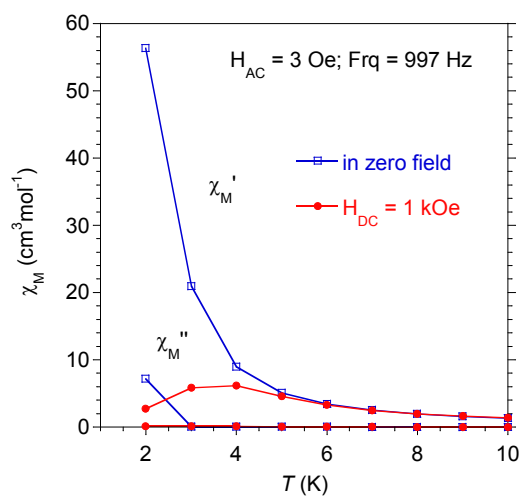

**Fig. S12.** Compound 3:  $\chi_M'$  and  $\chi_M'' = f(T)$  in zero and 1 kOe dc field between 2-10 K.
